# Supplementary material
Source: publisher figshare collection journal article supplement (https://acs.figshare.com/ndownloader/files/4328746)
Supplement: Supplementary file 1 [file 4328746]

 
data_max17 
 
_audit_creation_method            SHELXL-97 
_chemical_name_systematic 
; 
 (E)-(1-Cymantrenyl-2-ferrocenyl)-1,2-difluoroethene 
; 
_chemical_name_common             ? 
_chemical_melting_point           ? 
_chemical_formula_moiety          ? 
_chemical_formula_sum 
 'C20 H13 F2 Fe Mn O3' 
_chemical_formula_weight          450.09 
 
loop_ 
 _atom_type_symbol 
 _atom_type_description 
 _atom_type_scat_dispersion_real 
 _atom_type_scat_dispersion_imag 
 _atom_type_scat_source 
 'C'  'C'   0.0033   0.0016 
 'International Tables Vol C Tables 4.2.6.8 and 6.1.1.4' 
 'H'  'H'   0.0000   0.0000 
 'International Tables Vol C Tables 4.2.6.8 and 6.1.1.4' 
 'O'  'O'   0.0106   0.0060 
 'International Tables Vol C Tables 4.2.6.8 and 6.1.1.4' 
 'F'  'F'   0.0171   0.0103 
 'International Tables Vol C Tables 4.2.6.8 and 6.1.1.4' 
 'Mn'  'Mn'   0.3368   0.7283 
 'International Tables Vol C Tables 4.2.6.8 and 6.1.1.4' 
 'Fe'  'Fe'   0.3463   0.8444 
 'International Tables Vol C Tables 4.2.6.8 and 6.1.1.4' 
 
_symmetry_cell_setting            monoclinic 
_symmetry_space_group_name_H-M    P2(1)/c 
 
loop_ 
 _symmetry_equiv_pos_as_xyz 
 'x, y, z' 
 '-x, y+1/2, -z+1/2' 
 '-x, -y, -z' 
 'x, -y-1/2, z-1/2' 
 
_cell_length_a                    6.764(2) 
_cell_length_b                    15.254(5) 
_cell_length_c                    16.830(5) 
_cell_angle_alpha                 90.00 
_cell_angle_beta                  97.149(7) 
_cell_angle_gamma                 90.00 
_cell_volume                      1723.0(9) 
_cell_formula_units_Z             4 
_cell_measurement_temperature     173(2) 
_cell_measurement_reflns_used     896 
_cell_measurement_theta_min       2.77 
_cell_measurement_theta_max       25.9
 
_exptl_crystal_description        needle
_exptl_crystal_colour             red
_exptl_crystal_size_max           0.42
_exptl_crystal_size_mid           0.23
_exptl_crystal_size_min           0.03
_exptl_crystal_density_meas       ?
_exptl_crystal_density_diffrn     1.735
_exptl_crystal_density_method     'not measured'
_exptl_crystal_F_000              904
_exptl_absorpt_coefficient_mu     1.613
_exptl_absorpt_correction_type    multi-scan
_exptl_absorpt_correction_T_min   0.69
_exptl_absorpt_correction_T_max   1.00
_exptl_absorpt_process_details    'SADABS (Bruker-AXS)'

 
_exptl_special_details 
; 
 ? 
; 
 
_diffrn_ambient_temperature       173(2) 
_diffrn_radiation_wavelength      0.71073 
_diffrn_radiation_type            MoK\a 
_diffrn_radiation_source          'sealed tube' 
_diffrn_radiation_monochromator   graphite 
_diffrn_measurement_device_type   'Bruker AXS Smart CCD'
_diffrn_measurement_method        'omega scan'
_diffrn_detector_area_resol_mean  ? 
_diffrn_standards_number          ? 
_diffrn_standards_interval_count  ? 
_diffrn_standards_interval_time   ? 
_diffrn_standards_decay_%         ? 
_diffrn_reflns_number             16844 
_diffrn_reflns_av_R_equivalents   0.0439 
_diffrn_reflns_av_sigmaI/netI     0.0357 
_diffrn_reflns_limit_h_min        -8 
_diffrn_reflns_limit_h_max        8 
_diffrn_reflns_limit_k_min        -19 
_diffrn_reflns_limit_k_max        18 
_diffrn_reflns_limit_l_min        -21 
_diffrn_reflns_limit_l_max        19 
_diffrn_reflns_theta_min          1.81 
_diffrn_reflns_theta_max          26.43 
_reflns_number_total              3528 
_reflns_number_gt                 2908 
_reflns_threshold_expression      >2sigma(I) 
 
_computing_data_collection        'SMART (Bruker-AXS)'
_computing_cell_refinement        'SAINT (Bruker-AXS)'
_computing_data_reduction         'SAINT (Bruker-AXS)' 
_computing_structure_solution     'SHELXS-97 (Sheldrick, 1990)' 
_computing_structure_refinement   'SHELXL-97 (Sheldrick, 1997)' 
_computing_molecular_graphics     'Ortep3 for Windows (Farrugia, 1997)' 
_computing_publication_material   ? 
 
_refine_special_details 
; 
 Refinement of F^2^ against ALL reflections.  The weighted R-factor wR and 
 goodness of fit S are based on F^2^, conventional R-factors R are based 
 on F, with F set to zero for negative F^2^. The threshold expression of 
 F^2^ > 2sigma(F^2^) is used only for calculating R-factors(gt) etc. and is 
 not relevant to the choice of reflections for refinement.  R-factors based 
 on F^2^ are statistically about twice as large as those based on F, and R- 
 factors based on ALL data will be even larger. 
 A disorder model was applied for the carbon atoms C11, C11', C12 and C12',
 respectively. Isotropic displacement parameters were used for these atoms.
; 
 
_refine_ls_structure_factor_coef  Fsqd  
_refine_ls_matrix_type            full 
_refine_ls_weighting_scheme       calc  
_refine_ls_weighting_details 
 'calc w=1/[\s^2^(Fo^2^)+(0.0173P)^2^+3.0206P] where P=(Fo^2^+2Fc^2^)/3' 
_atom_sites_solution_primary      direct 
_atom_sites_solution_secondary    difmap 
_atom_sites_solution_hydrogens    geom 
_refine_ls_hydrogen_treatment     constr 
_refine_ls_extinction_method      none 
_refine_ls_extinction_coef        ? 
_refine_ls_number_reflns          3528 
_refine_ls_number_parameters      243 
_refine_ls_number_restraints      0 
_refine_ls_R_factor_all           0.0502 
_refine_ls_R_factor_gt            0.0381 
_refine_ls_wR_factor_ref          0.0837 
_refine_ls_wR_factor_gt           0.0796 
_refine_ls_goodness_of_fit_ref    1.100 
_refine_ls_restrained_S_all       1.100 
_refine_ls_shift/su_max           0.000 
_refine_ls_shift/su_mean          0.000 
 
loop_ 
 _atom_site_label 
 _atom_site_type_symbol 
 _atom_site_fract_x 
 _atom_site_fract_y 
 _atom_site_fract_z 
 _atom_site_U_iso_or_equiv 
 _atom_site_adp_type 
 _atom_site_occupancy 
 _atom_site_symmetry_multiplicity 
 _atom_site_calc_flag 
 _atom_site_refinement_flags 
 _atom_site_disorder_assembly 
 _atom_site_disorder_group 
Fe1 Fe 0.02752(7) 0.99187(3) 0.24661(3) 0.02442(12) Uani 1 1 d . . . 
Mn1 Mn 0.49196(7) 0.72061(3) 0.46768(3) 0.02266(12) Uani 1 1 d . . . 
C1 C 0.0176(7) 0.8591(2) 0.2399(3) 0.0539(12) Uani 1 1 d . . . 
H1 H 0.0776 0.8196 0.2795 0.065 Uiso 1 1 calc R . . 
C2 C -0.1757(6) 0.8930(3) 0.2354(2) 0.0496(11) Uani 1 1 d . . . 
H2 H -0.2700 0.8812 0.2713 0.060 Uiso 1 1 calc R . . 
C3 C -0.2047(5) 0.9481(2) 0.1672(2) 0.0421(9) Uani 1 1 d . . . 
H3 H -0.3229 0.9796 0.1490 0.050 Uiso 1 1 calc R . . 
C4 C -0.0293(6) 0.9482(2) 0.1314(2) 0.0417(9) Uani 1 1 d . . . 
H4 H -0.0070 0.9801 0.0848 0.050 Uiso 1 1 calc R . . 
C5 C 0.1076(6) 0.8933(3) 0.1760(3) 0.0512(11) Uani 1 1 d . . . 
H5 H 0.2391 0.8812 0.1649 0.061 Uiso 1 1 calc R . . 
C6 C 0.0024(5) 1.0558(2) 0.3510(2) 0.0363(8) Uani 1 1 d . . . 
H6 H -0.0846 1.0399 0.3888 0.044 Uiso 1 1 calc R . . 
C7 C -0.0414(5) 1.1136(2) 0.2857(2) 0.0383(8) Uani 1 1 d . . . 
H7 H -0.1637 1.1439 0.2721 0.046 Uiso 1 1 calc R . . 
C8 C 0.1255(6) 1.1188(2) 0.2442(2) 0.0432(9) Uani 1 1 d . . . 
H8 H 0.1358 1.1529 0.1977 0.052 Uiso 1 1 calc R . . 
C9 C 0.2746(5) 1.0646(2) 0.2834(2) 0.0424(9) Uani 1 1 d . . . 
H9 H 0.4034 1.0557 0.2678 0.051 Uiso 1 1 calc R . . 
C10 C 0.2009(5) 1.0259(2) 0.3498(2) 0.0358(8) Uani 1 1 d . . . 
C11 C 0.2627(9) 0.9589(3) 0.4141(3) 0.0252(17) Uiso 0.576(11) 1 d P . . 
C11' C 0.3593(11) 0.9714(5) 0.3917(5) 0.023(2) Uiso 0.424(11) 1 d P . . 
C12 C 0.4433(9) 0.9271(3) 0.4321(3) 0.0255(17) Uiso 0.576(11) 1 d P . . 
C12' C 0.3299(11) 0.9176(5) 0.4507(4) 0.022(2) Uiso 0.424(11) 1 d P . . 
C13 C 0.4983(6) 0.8587(2) 0.4920(2) 0.0382(9) Uani 1 1 d . . . 
C14 C 0.6946(6) 0.8273(2) 0.4910(2) 0.0414(9) Uani 1 1 d . . . 
H14 H 0.7845 0.8455 0.4552 0.050 Uiso 1 1 calc R . . 
C15 C 0.7339(5) 0.7650(2) 0.5519(2) 0.0398(9) Uani 1 1 d . . . 
H15 H 0.8551 0.7337 0.5643 0.048 Uiso 1 1 calc R . . 
C16 C 0.5652(6) 0.7565(2) 0.5916(2) 0.0365(8) Uani 1 1 d . . . 
H16 H 0.5518 0.7189 0.6356 0.044 Uiso 1 1 calc R . . 
C17 C 0.4197(5) 0.8136(2) 0.5547(2) 0.0378(8) Uani 1 1 d . . . 
H17 H 0.2894 0.8209 0.5693 0.045 Uiso 1 1 calc R . . 
C18 C 0.4757(5) 0.7332(2) 0.3612(2) 0.0285(7) Uani 1 1 d . . . 
C19 C 0.5983(5) 0.6124(2) 0.4625(2) 0.0298(7) Uani 1 1 d . . . 
C20 C 0.2436(5) 0.6778(2) 0.4609(2) 0.0311(7) Uani 1 1 d . . . 
F1 F 0.1300(3) 0.92026(15) 0.46268(13) 0.0475(6) Uani 1 1 d . . . 
F2 F 0.5712(3) 0.96484(15) 0.38246(15) 0.0581(7) Uani 1 1 d . . . 
O1 O 0.4650(4) 0.74430(17) 0.29342(15) 0.0433(6) Uani 1 1 d . . . 
O2 O 0.0825(4) 0.6532(2) 0.45753(17) 0.0537(7) Uani 1 1 d . . . 
O3 O 0.6646(4) 0.54391(15) 0.45747(16) 0.0417(6) Uani 1 1 d . . . 
 
loop_ 
 _atom_site_aniso_label 
 _atom_site_aniso_U_11 
 _atom_site_aniso_U_22 
 _atom_site_aniso_U_33 
 _atom_site_aniso_U_23 
 _atom_site_aniso_U_13 
 _atom_site_aniso_U_12 
Fe1 0.0291(2) 0.0206(2) 0.0224(2) -0.00180(18) -0.00117(18) -0.00224(18) 
Mn1 0.0231(2) 0.0213(2) 0.0230(3) -0.00204(19) 0.00047(18) -0.00038(18) 
C1 0.085(3) 0.0208(17) 0.048(3) -0.0037(16) -0.025(2) -0.0005(19) 
C2 0.061(3) 0.048(2) 0.041(2) -0.0123(18) 0.011(2) -0.033(2) 
C3 0.0363(19) 0.044(2) 0.042(2) -0.0128(18) -0.0109(17) -0.0067(16) 
C4 0.058(2) 0.044(2) 0.0230(18) -0.0094(16) 0.0038(17) -0.0130(18) 
C5 0.043(2) 0.049(2) 0.061(3) -0.033(2) 0.001(2) 0.0058(19) 
C6 0.047(2) 0.0347(19) 0.0275(19) -0.0079(15) 0.0043(16) -0.0025(16) 
C7 0.043(2) 0.0250(17) 0.043(2) -0.0080(15) -0.0111(17) 0.0082(15) 
C8 0.064(3) 0.0265(18) 0.036(2) 0.0046(15) -0.0061(19) -0.0126(17) 
C9 0.0356(19) 0.041(2) 0.050(2) -0.0158(18) 0.0022(17) -0.0095(16) 
C10 0.050(2) 0.0244(16) 0.0269(19) -0.0085(13) -0.0182(16) 0.0062(15) 
C13 0.065(2) 0.0207(16) 0.0237(18) -0.0074(13) -0.0163(17) 0.0036(16) 
C14 0.051(2) 0.039(2) 0.034(2) -0.0120(16) 0.0038(17) -0.0212(17) 
C15 0.0334(19) 0.038(2) 0.043(2) -0.0131(16) -0.0140(16) 0.0024(15) 
C16 0.054(2) 0.0292(17) 0.0241(18) -0.0022(14) -0.0025(16) -0.0002(16) 
C17 0.0377(19) 0.0392(19) 0.036(2) -0.0204(16) 0.0013(16) 0.0042(16) 
C18 0.0276(16) 0.0260(16) 0.032(2) -0.0051(13) 0.0032(14) -0.0019(13) 
C19 0.0303(17) 0.0300(18) 0.0283(18) -0.0009(13) -0.0003(14) -0.0050(14) 
C20 0.0319(18) 0.0343(18) 0.0271(18) -0.0063(14) 0.0040(14) 0.0002(14) 
F1 0.0300(11) 0.0617(14) 0.0542(14) 0.0082(11) 0.0187(10) -0.0003(10) 
F2 0.0457(13) 0.0573(15) 0.0784(18) 0.0027(12) 0.0358(12) -0.0122(11) 
O1 0.0540(16) 0.0524(16) 0.0243(14) -0.0011(11) 0.0076(12) -0.0046(13) 
O2 0.0311(14) 0.071(2) 0.0600(19) -0.0129(15) 0.0108(13) -0.0158(13) 
O3 0.0444(14) 0.0275(13) 0.0534(17) -0.0033(11) 0.0068(12) 0.0059(11) 
 
_geom_special_details 
; 
 All esds (except the esd in the dihedral angle between two l.s. planes) 
 are estimated using the full covariance matrix.  The cell esds are taken 
 into account individually in the estimation of esds in distances, angles 
 and torsion angles; correlations between esds in cell parameters are only 
 used when they are defined by crystal symmetry.  An approximate (isotropic) 
 treatment of cell esds is used for estimating esds involving l.s. planes. 
; 
 
loop_ 
 _geom_bond_atom_site_label_1 
 _geom_bond_atom_site_label_2 
 _geom_bond_distance 
 _geom_bond_site_symmetry_2 
 _geom_bond_publ_flag 
Fe1 C1 2.030(4) . ? 
Fe1 C5 2.032(4) . ? 
Fe1 C2 2.034(4) . ? 
Fe1 C6 2.035(3) . ? 
Fe1 C9 2.037(4) . ? 
Fe1 C10 2.037(3) . ? 
Fe1 C4 2.042(3) . ? 
Fe1 C7 2.043(3) . ? 
Fe1 C3 2.044(3) . ? 
Fe1 C8 2.048(3) . ? 
Mn1 C18 1.791(4) . ? 
Mn1 C20 1.793(3) . ? 
Mn1 C19 1.807(3) . ? 
Mn1 C14 2.133(3) . ? 
Mn1 C15 2.138(3) . ? 
Mn1 C17 2.138(3) . ? 
Mn1 C13 2.146(3) . ? 
Mn1 C16 2.153(3) . ? 
C1 C2 1.399(6) . ? 
C1 C5 1.401(6) . ? 
C2 C3 1.416(6) . ? 
C3 C4 1.396(5) . ? 
C4 C5 1.397(6) . ? 
C6 C7 1.411(5) . ? 
C6 C10 1.421(5) . ? 
C7 C8 1.401(5) . ? 
C8 C9 1.403(5) . ? 
C9 C10 1.410(5) . ? 
C10 C11' 1.466(8) . ? 
C10 C11 1.509(6) . ? 
C11 C11' 0.817(7) . ? 
C11 C12' 0.956(8) . ? 
C11 C12 1.314(9) . ? 
C11 F1 1.415(6) . ? 
C11' C12 1.070(8) . ? 
C11' C12' 1.323(12) . ? 
C11' F2 1.464(8) . ? 
C12 C12' 0.876(7) . ? 
C12 F2 1.399(6) . ? 
C12 C13 1.466(6) . ? 
C12' F1 1.392(7) . ? 
C12' C13 1.545(8) . ? 
C13 C14 1.413(5) . ? 
C13 C17 1.418(5) . ? 
C14 C15 1.399(5) . ? 
C15 C16 1.397(5) . ? 
C16 C17 1.400(5) . ? 
C18 O1 1.147(4) . ? 
C19 O3 1.144(4) . ? 
C20 O2 1.147(4) . ? 
 
loop_ 
 _geom_angle_atom_site_label_1 
 _geom_angle_atom_site_label_2 
 _geom_angle_atom_site_label_3 
 _geom_angle 
 _geom_angle_site_symmetry_1 
 _geom_angle_site_symmetry_3 
 _geom_angle_publ_flag 
C1 Fe1 C5 40.35(18) . . ? 
C1 Fe1 C2 40.29(18) . . ? 
C5 Fe1 C2 67.82(17) . . ? 
C1 Fe1 C6 121.37(17) . . ? 
C5 Fe1 C6 156.46(17) . . ? 
C2 Fe1 C6 107.94(15) . . ? 
C1 Fe1 C9 125.50(17) . . ? 
C5 Fe1 C9 108.22(16) . . ? 
C2 Fe1 C9 162.14(18) . . ? 
C6 Fe1 C9 68.30(15) . . ? 
C1 Fe1 C10 108.22(15) . . ? 
C5 Fe1 C10 121.32(15) . . ? 
C2 Fe1 C10 125.36(16) . . ? 
C6 Fe1 C10 40.83(14) . . ? 
C9 Fe1 C10 40.48(15) . . ? 
C1 Fe1 C4 67.71(16) . . ? 
C5 Fe1 C4 40.10(16) . . ? 
C2 Fe1 C4 67.93(15) . . ? 
C6 Fe1 C4 161.90(16) . . ? 
C9 Fe1 C4 121.10(16) . . ? 
C10 Fe1 C4 155.92(16) . . ? 
C1 Fe1 C7 156.60(18) . . ? 
C5 Fe1 C7 161.66(18) . . ? 
C2 Fe1 C7 121.70(17) . . ? 
C6 Fe1 C7 40.50(14) . . ? 
C9 Fe1 C7 67.58(15) . . ? 
C10 Fe1 C7 67.96(13) . . ? 
C4 Fe1 C7 125.36(15) . . ? 
C1 Fe1 C3 67.69(16) . . ? 
C5 Fe1 C3 67.33(16) . . ? 
C2 Fe1 C3 40.65(16) . . ? 
C6 Fe1 C3 125.54(15) . . ? 
C9 Fe1 C3 155.67(16) . . ? 
C10 Fe1 C3 162.62(16) . . ? 
C4 Fe1 C3 39.96(15) . . ? 
C7 Fe1 C3 108.65(15) . . ? 
C1 Fe1 C8 161.95(19) . . ? 
C5 Fe1 C8 125.29(18) . . ? 
C2 Fe1 C8 156.33(18) . . ? 
C6 Fe1 C8 68.04(15) . . ? 
C9 Fe1 C8 40.17(15) . . ? 
C10 Fe1 C8 67.86(14) . . ? 
C4 Fe1 C8 108.22(15) . . ? 
C7 Fe1 C8 40.07(15) . . ? 
C3 Fe1 C8 121.33(16) . . ? 
C18 Mn1 C20 92.01(15) . . ? 
C18 Mn1 C19 91.46(14) . . ? 
C20 Mn1 C19 92.26(15) . . ? 
C18 Mn1 C14 93.46(14) . . ? 
C20 Mn1 C14 149.94(15) . . ? 
C19 Mn1 C14 117.09(15) . . ? 
C18 Mn1 C15 125.18(15) . . ? 
C20 Mn1 C15 142.31(15) . . ? 
C19 Mn1 C15 92.56(14) . . ? 
C14 Mn1 C15 38.25(14) . . ? 
C18 Mn1 C17 128.52(14) . . ? 
C20 Mn1 C17 89.60(14) . . ? 
C19 Mn1 C17 139.90(15) . . ? 
C14 Mn1 C17 64.16(14) . . ? 
C15 Mn1 C17 63.70(14) . . ? 
C18 Mn1 C13 94.73(14) . . ? 
C20 Mn1 C13 111.51(15) . . ? 
C19 Mn1 C13 155.15(15) . . ? 
C14 Mn1 C13 38.57(15) . . ? 
C15 Mn1 C13 64.33(14) . . ? 
C17 Mn1 C13 38.67(14) . . ? 
C18 Mn1 C16 156.80(14) . . ? 
C20 Mn1 C16 104.78(15) . . ? 
C19 Mn1 C16 103.52(14) . . ? 
C14 Mn1 C16 64.04(14) . . ? 
C15 Mn1 C16 38.00(14) . . ? 
C17 Mn1 C16 38.07(13) . . ? 
C13 Mn1 C16 64.46(13) . . ? 
C2 C1 C5 108.2(4) . . ? 
C2 C1 Fe1 70.0(2) . . ? 
C5 C1 Fe1 69.9(2) . . ? 
C1 C2 C3 107.4(4) . . ? 
C1 C2 Fe1 69.7(2) . . ? 
C3 C2 Fe1 70.1(2) . . ? 
C4 C3 C2 108.1(4) . . ? 
C4 C3 Fe1 69.9(2) . . ? 
C2 C3 Fe1 69.3(2) . . ? 
C3 C4 C5 108.0(4) . . ? 
C3 C4 Fe1 70.1(2) . . ? 
C5 C4 Fe1 69.6(2) . . ? 
C4 C5 C1 108.3(4) . . ? 
C4 C5 Fe1 70.3(2) . . ? 
C1 C5 Fe1 69.7(2) . . ? 
C7 C6 C10 107.3(3) . . ? 
C7 C6 Fe1 70.03(19) . . ? 
C10 C6 Fe1 69.67(19) . . ? 
C8 C7 C6 108.6(3) . . ? 
C8 C7 Fe1 70.2(2) . . ? 
C6 C7 Fe1 69.47(19) . . ? 
C7 C8 C9 108.0(3) . . ? 
C7 C8 Fe1 69.76(19) . . ? 
C9 C8 Fe1 69.5(2) . . ? 
C8 C9 C10 108.3(3) . . ? 
C8 C9 Fe1 70.3(2) . . ? 
C10 C9 Fe1 69.8(2) . . ? 
C9 C10 C6 107.8(3) . . ? 
C9 C10 C11' 108.1(4) . . ? 
C6 C10 C11' 144.2(5) . . ? 
C9 C10 C11 139.4(4) . . ? 
C6 C10 C11 112.6(4) . . ? 
C11' C10 C11 31.8(3) . . ? 
C9 C10 Fe1 69.8(2) . . ? 
C6 C10 Fe1 69.50(19) . . ? 
C11' C10 Fe1 125.1(3) . . ? 
C11 C10 Fe1 121.2(3) . . ? 
C11' C11 C12' 96.2(10) . . ? 
C11' C11 C12 54.4(7) . . ? 
C12' C11 C12 41.8(5) . . ? 
C11' C11 F1 164.8(9) . . ? 
C12' C11 F1 68.8(6) . . ? 
C12 C11 F1 110.6(5) . . ? 
C11' C11 C10 71.1(7) . . ? 
C12' C11 C10 167.3(8) . . ? 
C12 C11 C10 125.6(5) . . ? 
F1 C11 C10 123.9(5) . . ? 
C11 C11' C12 87.2(10) . . ? 
C11 C11' C12' 45.9(7) . . ? 
C12 C11' C12' 41.3(5) . . ? 
C11 C11' F2 152.0(10) . . ? 
C12 C11' F2 64.9(5) . . ? 
C12' C11' F2 106.1(6) . . ? 
C11 C11' C10 77.0(7) . . ? 
C12 C11' C10 164.2(9) . . ? 
C12' C11' C10 123.0(7) . . ? 
F2 C11' C10 130.8(6) . . ? 
C12' C12 C11' 85.0(9) . . ? 
C12' C12 C11 46.7(6) . . ? 
C11' C12 C11 38.4(5) . . ? 
C12' C12 F2 156.3(8) . . ? 
C11' C12 F2 71.3(5) . . ? 
C11 C12 F2 109.7(5) . . ? 
C12' C12 C13 78.1(6) . . ? 
C11' C12 C13 162.8(7) . . ? 
C11 C12 C13 124.8(5) . . ? 
F2 C12 C13 125.5(5) . . ? 
C12 C12' C11 91.5(10) . . ? 
C12 C12' C11' 53.7(7) . . ? 
C11 C12' C11' 37.9(5) . . ? 
C12 C12' F1 162.9(9) . . ? 
C11 C12' F1 71.4(6) . . ? 
C11' C12' F1 109.2(6) . . ? 
C12 C12' C13 68.2(6) . . ? 
C11 C12' C13 159.6(9) . . ? 
C11' C12' C13 121.8(6) . . ? 
F1 C12' C13 128.9(6) . . ? 
C14 C13 C17 106.5(3) . . ? 
C14 C13 C12 113.1(4) . . ? 
C17 C13 C12 140.4(4) . . ? 
C14 C13 C12' 146.4(4) . . ? 
C17 C13 C12' 107.0(4) . . ? 
C12 C13 C12' 33.7(3) . . ? 
C14 C13 Mn1 70.23(19) . . ? 
C17 C13 Mn1 70.39(19) . . ? 
C12 C13 Mn1 124.7(3) . . ? 
C12' C13 Mn1 119.2(3) . . ? 
C15 C14 C13 108.3(3) . . ? 
C15 C14 Mn1 71.1(2) . . ? 
C13 C14 Mn1 71.2(2) . . ? 
C16 C15 C14 108.7(3) . . ? 
C16 C15 Mn1 71.6(2) . . ? 
C14 C15 Mn1 70.7(2) . . ? 
C15 C16 C17 107.6(3) . . ? 
C15 C16 Mn1 70.4(2) . . ? 
C17 C16 Mn1 70.39(19) . . ? 
C16 C17 C13 108.9(3) . . ? 
C16 C17 Mn1 71.54(19) . . ? 
C13 C17 Mn1 70.94(18) . . ? 
O1 C18 Mn1 177.7(3) . . ? 
O3 C19 Mn1 178.5(3) . . ? 
O2 C20 Mn1 177.5(3) . . ? 
C12' F1 C11 39.8(3) . . ? 
C12 F2 C11' 43.8(3) . . ? 
 
_diffrn_measured_fraction_theta_max    0.995 
_diffrn_reflns_theta_full              26.43 
_diffrn_measured_fraction_theta_full   0.995 
_refine_diff_density_max    0.586 
_refine_diff_density_min   -0.401 
_refine_diff_density_rms    0.076 
